# Supplementary material
Source: Springer Nature journal article supplement (http://www.springermedizin.de/resource/supplementary/12958_2009_603_MOESM2_ESM.pdf/9568076)

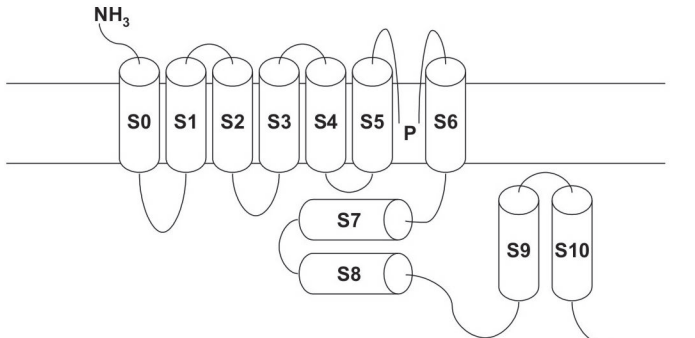

|                        |            |
|------------------------|------------|
| WT                     | YNMLCFGYIY |
| F1012A                 | YNMLCAGIY  |
| Y1007A, F1012A         | ANMLCAGIY  |
| Y1007A, F1012A, Y1015A | ANMLCAGIA  |

COOH

Supplement: MOESM2 [file 9568076]
